# Supplementary material for: Mesoporous SiO2and Nb2O5thin films with large spherical mesopores through self-assembly of diblock copolymers: unusual conversion to cuboidal mesopores by Nb2O5crystal growth
Source: Royal Society of Chemistry journal article supplement (doi:10.1039/c0ce00507j), 2010-10-22
Supplement: c0ce00507j.pdf [file c0ce00507j.pdf]

## Electronic Supplementary Information (ESI)

### A. Experimental details

#### 1. Preparation of mesoporous silica films:

The precursor solution was firstly prepared by mixing TEOS, 0.1 M HCl solution (0.15 g), THF (2.45 g), PS(20000)-*b*-PEO(6500) block copolymer (0.05 g). After stirring for 1 h, a transparent solution was obtained. To investigate the optimal amount of TEOS, several precursor solutions were prepared by changing the amount of TEOS as follows: 0.5 g (**Solution A**), 0.33 g (**Solution B**), 0.17 g (**Solution C**), 0.08 g (**Solution D**), and 0.04 g (**Solution E**). The weight ratios of TEOS of block copolymer were varied 10 (**Solution A**), 6.6 (**Solution B**), 3.4 (**Solution C**), 1.6 (**Solution D**), and 0.8 (**Solution E**), respectively.

Then, fabrication of thin films was conducted by a dip coater ND-0407-SI (SDI Company., LTD.). Before the use, silicon substrates were washed with ethanol, HF solution, and distilled water. The solutions were dip-coated on the substrates at various speeds (from 1 mm•sec<sup>-1</sup> to 20 μm•sec<sup>-1</sup>). After that, the thin films were dried in air and then calcined at 600 °C for 6 h. The film thickness was around 100 nm.

#### 2. Preparation of a precursor solution for niobia films:

The mixture consisting of niobium ethoxide (0.750 g), acetic acid (0.575 g) and concentrated HCl (0.30 g) was added to 2.5 g of THF solution including PS(20000)-*b*-PEO(6500) (2.0 wt % containing 0.05 g copolymer). After stirring for 1 h, the solution was coated by a dip-coating method. Finally, the as-prepared films were aged at 100 °C for 1 day and calcined at 500 °C and 600 °C for 6 h. When the

as-prepared films were calcined at lower temperature (below 400 °C), mesoporous structures were not clearly confirmed. Because PS-*b*-PEO block polymers generally burn out completely at around 500 °C in air, a part of block copolymers still remained in the films. The film thickness was around 100 nm.

## B. Additional characterization data

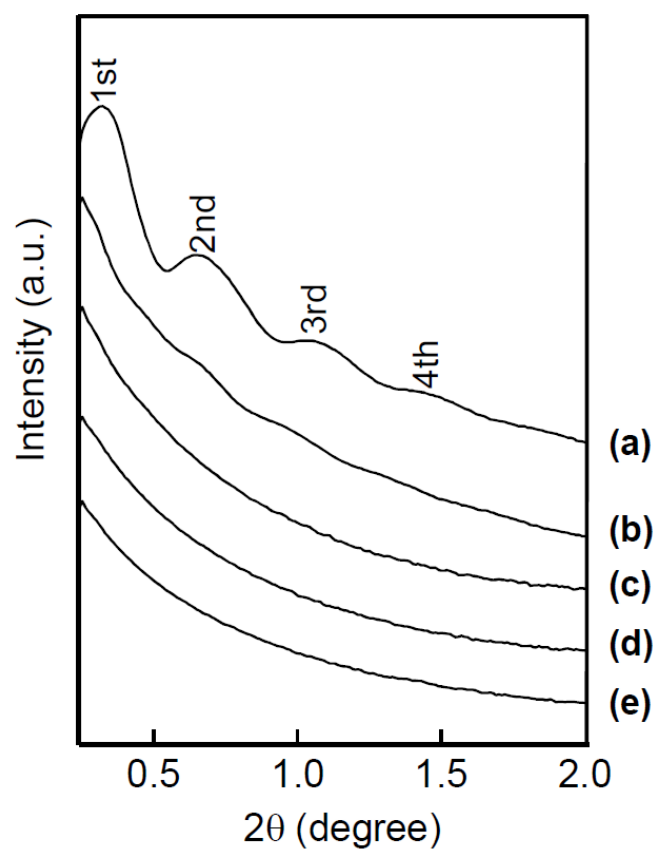

**Figure S1** SAXS patterns of mesoporous silica films prepared from (a) **Solution A**, (b) **Solution B**, (c) **Solution C**, (d) **Solution D**, and (e) **Solution E**, respectively. The weight ratios of TEOS of block copolymer are 10 (**Solution A**), 6.6 (**Solution B**), 3.4 (**Solution C**), 1.6 (**Solution D**), and 0.8 (**Solution E**), respectively. The several peaks of pattern (a) are 27.6 nm ( $2\theta = 0.32^\circ$ ), 13.6 nm ( $2\theta = 0.65^\circ$ ), 8.5 nm ( $2\theta = 1.04^\circ$ ), and 6.0 nm ( $2\theta = 1.47^\circ$ ), respectively.

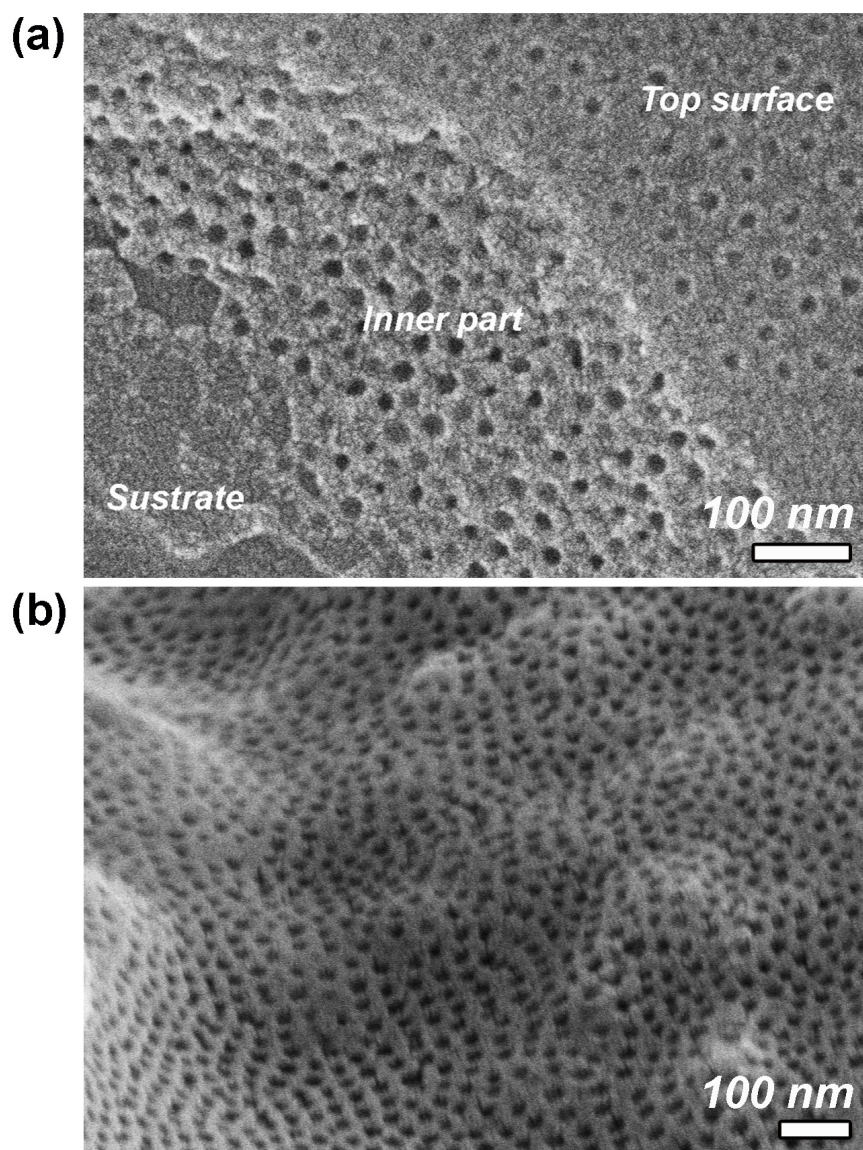

**Figure S2** SEM images of the calcined mesoporous silica films prepared under dip-coating speed ( $50 \mu\text{m}\cdot\text{sec}^{-1}$ ). (a) Bird-eye view of the accidentally cracked area. The cross-sectional part shows that lots of mesopores are closely packed from the substrate to the top surface of the film. (b) Top-surface image after the removal of the upper layers of silica film.

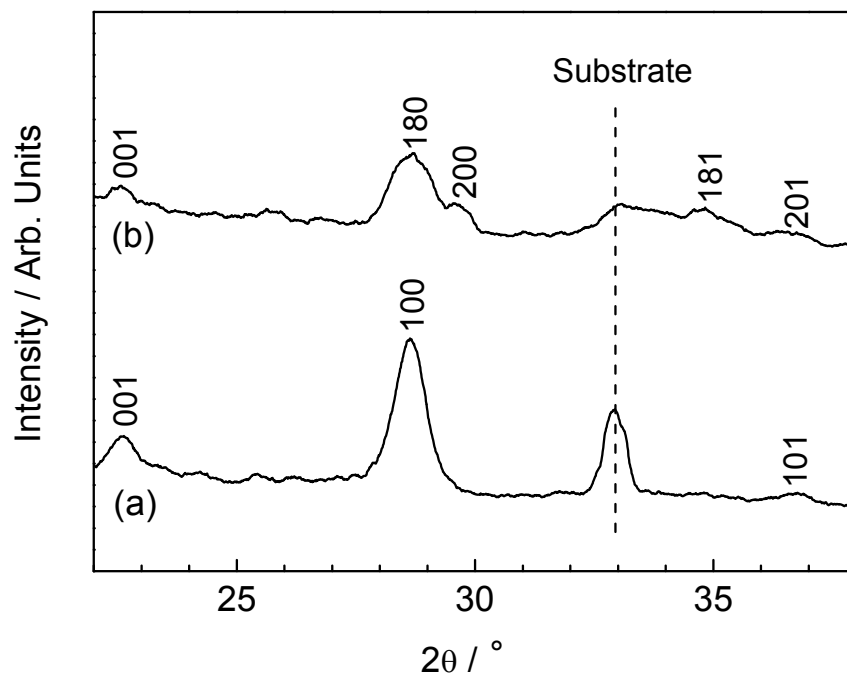

**Figure S3** Wide-angle XRD patterns of mesoporous niobia thin films after calcination at (a) 500 °C (with a pseudo-hexagonal TT-Phase) and (b) 600 °C (with a orthorhombic T-phase). The peak appeared at around 33 ° is derived from the silicon substrate. Because weak (250) and (260) reflections of T-Phase exist at around  $2\theta = 33^\circ$ , the peak derived from the Si substrate seems to be widen.

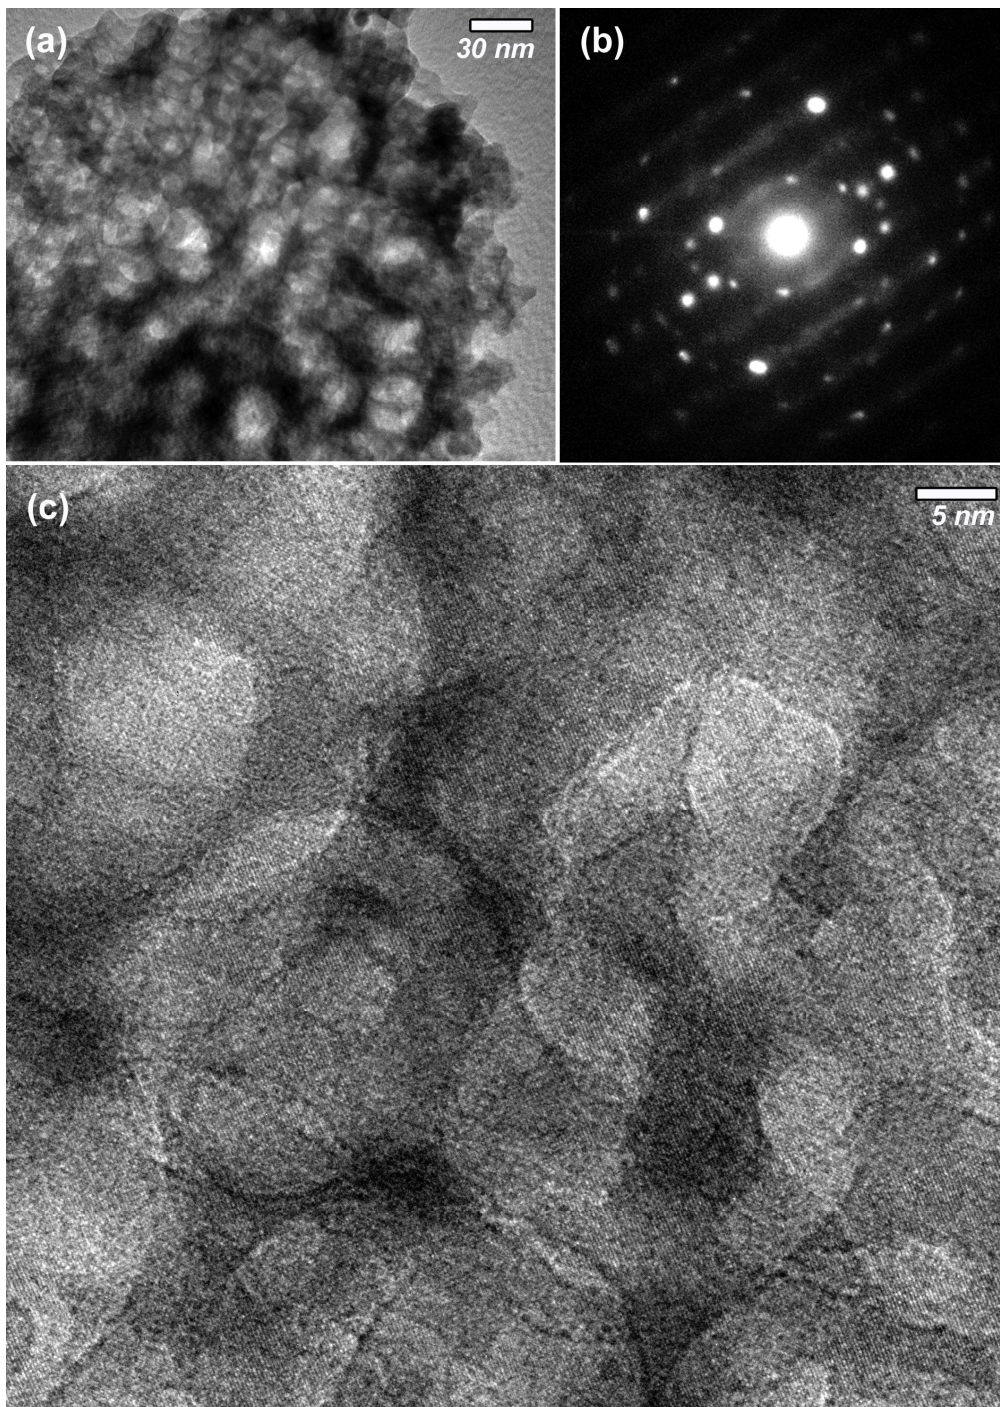

**Figure S4** TEM images and the corresponding ED patterns of mesoporous niobia thin films after calcination at 500 °C (with a pseudo-hexagonal TT-Phase). The ED patterns can be assigned to be a pseudo-hexagonal TT-Phase.

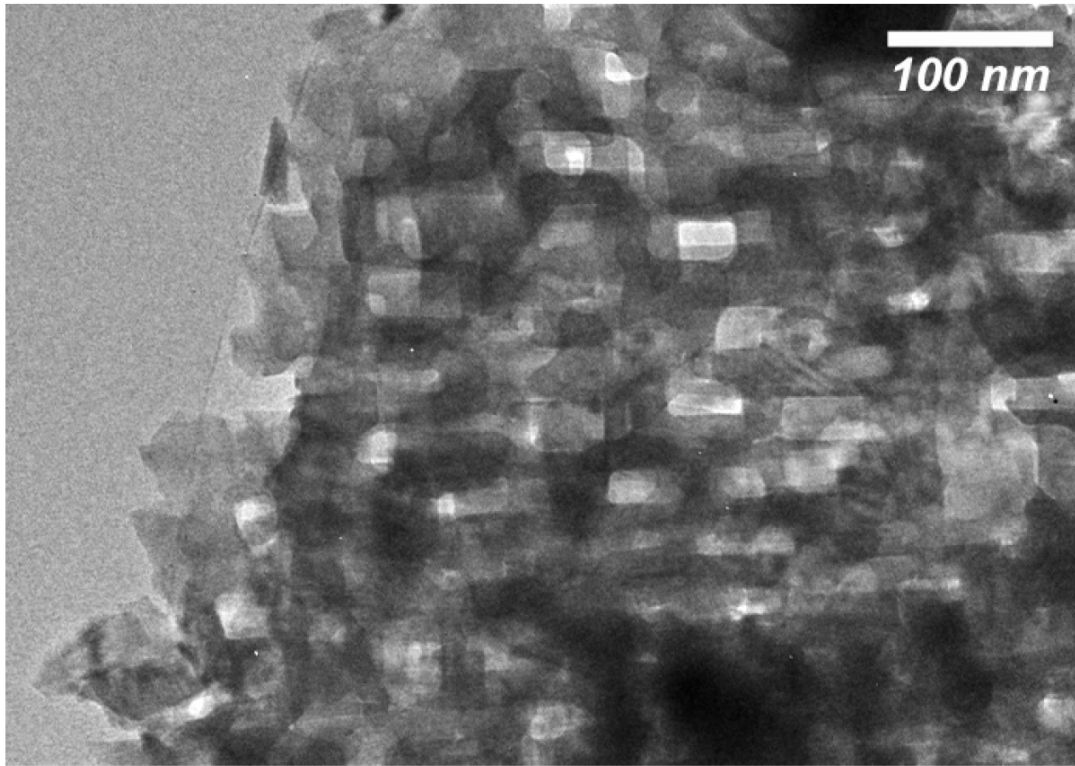

**Figure S5** TEM image with the incident electron beam perpendicular to the long axis of the cuboid shaped mesopores of mesoporous niobia thin films after calcination at 600°C (with an orthorhombic T-phase). The observed area is different area from **Figures 4b**. The cuboid shaped mesopores are successfully formed over the entire area.

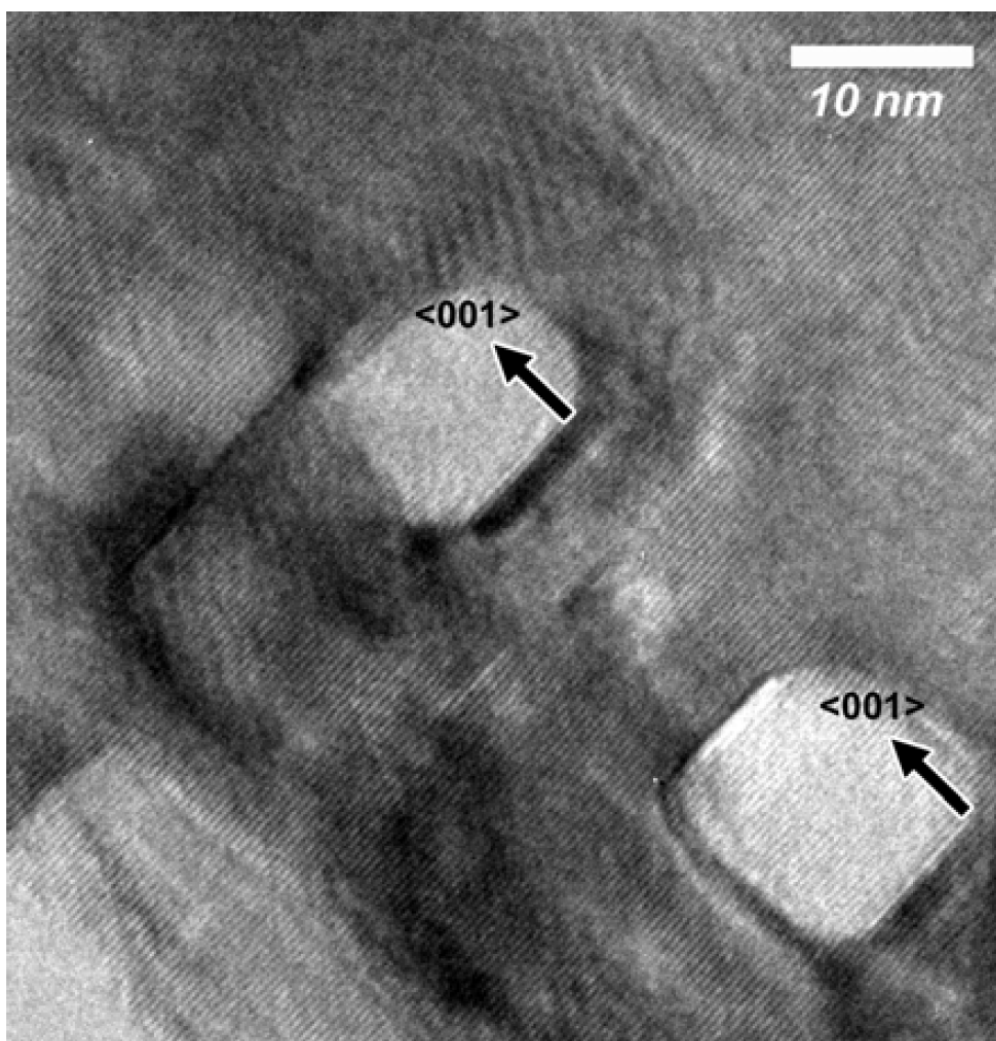

**Figure S6** Highly magnified TEM image with the incident electron beam parallel to the long axis of the cuboid shaped mesopores of mesoporous niobia thin films after calcination at 600°C (with an orthorhombic T-phase). The <001> facet planes are exposed on both the mesopores. The observed area is different area from **Figure 4**. Since the mesopore is tilted to the incident beam, the lattice fringes are observed inside the mesopore range.
